# Supplementary material for: Visfatin Enhances Breast Cancer Progression through CXCL1 Induction in Tumor-Associated Macrophages
Source: PubMed Central journal article supplement (PMC7760195; doi:10.3390/cancers12123526), 2020-11-26
Supplement: cancers-12-03526-s001.pdf [file cancers-12-03526-s001.pdf]

## Supplementary Materials:

# Visfatin Enhances Breast Cancer Progression through CXCL1 Induction in Tumor-Associated Macrophages

Yen-Yun Wang, Huan-Da Chen, Steven Lo, Yuk-Kwan Chen, Yu-Ci Huang, Stephen Chu-Sung Hu, Ya-Ching Hsieh, Amos C. Hung, Ming-Feng Hou and Shyng-Shiou F. Yuan

### Supplementary data

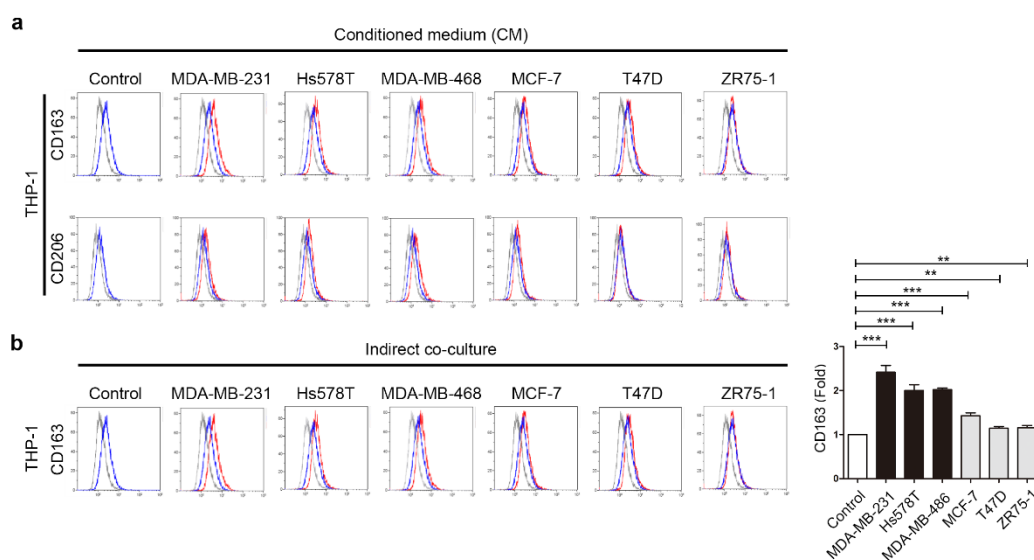

**Figure S1.** Breast cancer cells induced THP-1 differentiation. (a) Flow cytometry histogram plot of Figure S1c. (b) Breast cancer cells and THP-1 were indirectly co-cultured for six days (1:1), and the M2 marker CD163 was analyzed by flow cytometry. The t-test was used for statistical analysis.  $p$ -value  $\leq 0.01$  marked as \*\*,  $\leq 0.001$  marked as \*\*\*.

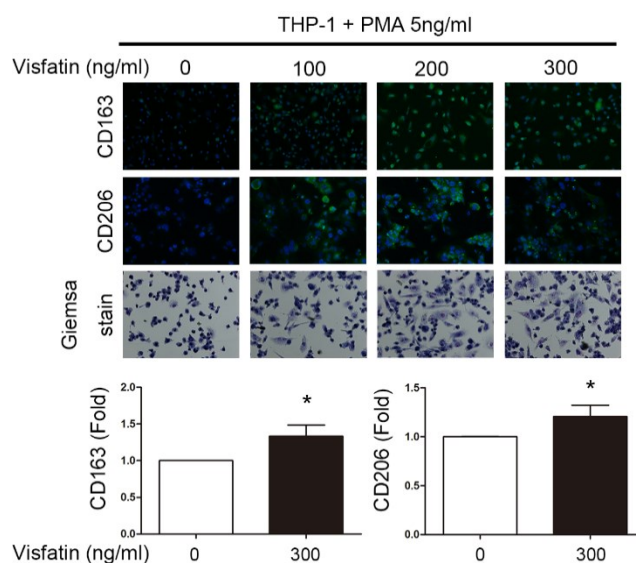

**Figure S2.** Visfatin combined with PMA induced THP-1 differentiation toward the M2 subtype. PMA is a compound that induces monocyte cells to differentiate into macrophages. THP-1 cells were treated with visfatin at different doses (0, 100, 200, 300 ng/mL) for six days after treatment with PMA for one day, and M2 markers CD163 and CD206 were detected in attached cells by

immunofluorescence staining. Giemsa stain was used to identify macrophages (40×). Statistical analysis was performed by the t-test and the correlation analysis by linear regression. *p*-value ≤ 0.05 is marked as \*.

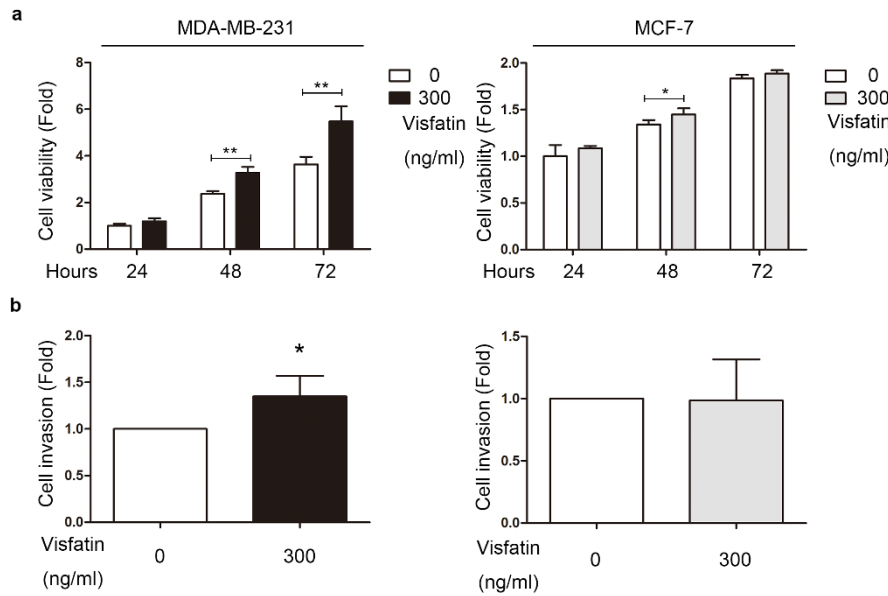

**Figure S3.** V-THP-1 enhanced breast cancer cell viability and invasion. (a) MDA-MB-231 and MCF-7 were co-cultured with V-THP-1 for 24 h. Cell viability was measured for another 24, 48 and 72 h. (b) MDA-MB-231 and MCF-7 were co-cultured with V-THP-1 for 24 h, and invasion ability was assessed in a trans-well system. Statistical analysis was performed by the t-test. *p*-value ≤ 0.05 marked as \*; ≤ 0.01 marked as \*\*.

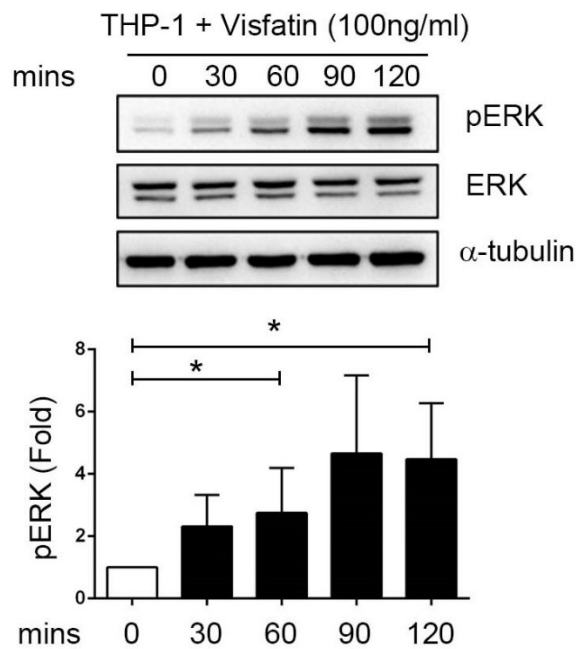

**Figure S4.** ERK phosphorylation induced by low dose of visfatin in the short-term period. THP-1 cells were treated with visfatin (0, 100 ng/mL) for short-term period (0, 30, 60, 90, 120 min), and phosphorylation of ERK was detected by western blot. Statistical analysis was performed by the t-test. *p*-value ≤ 0.05 marked as \*.



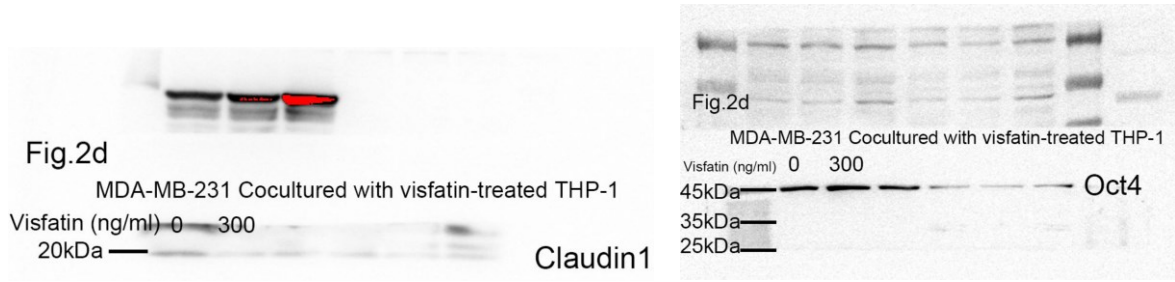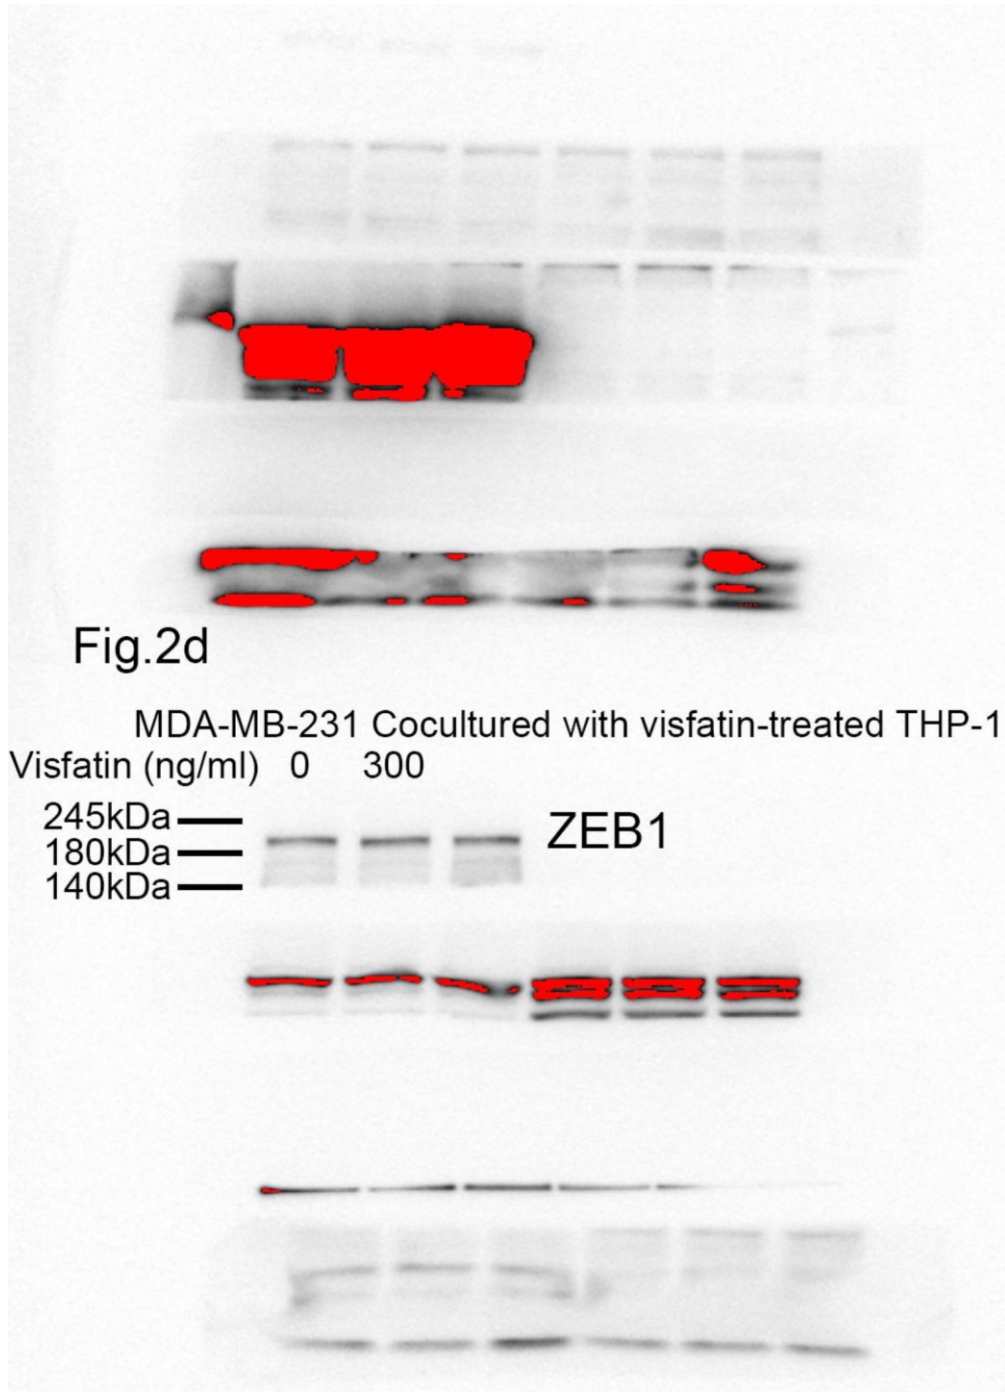

**Figure S7.** Original WB for EMT and stemness markers in MDA-MB-231 cells cocultured with visfatin-treated THP-1 cells.

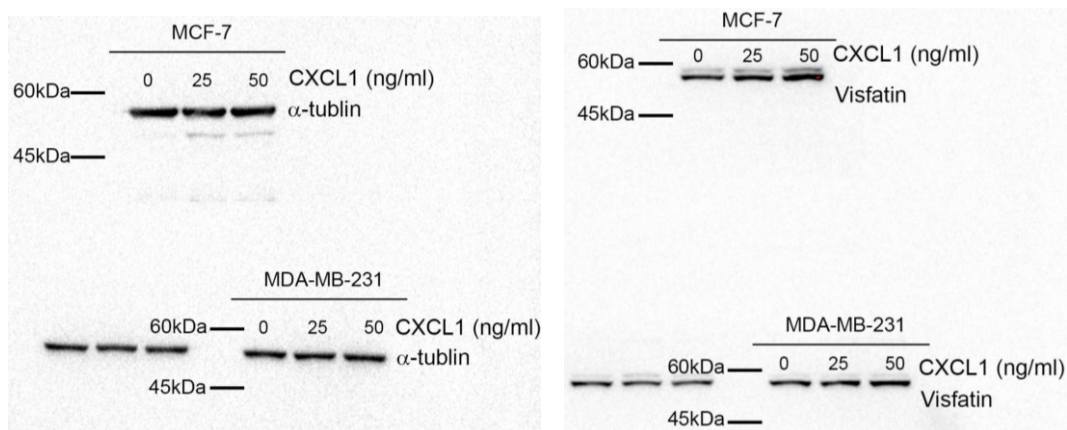

**Figure S8.** Original WB for visfatin expression in MCF-7 and MDA-MB-231 cells after CXCL1 treatment.

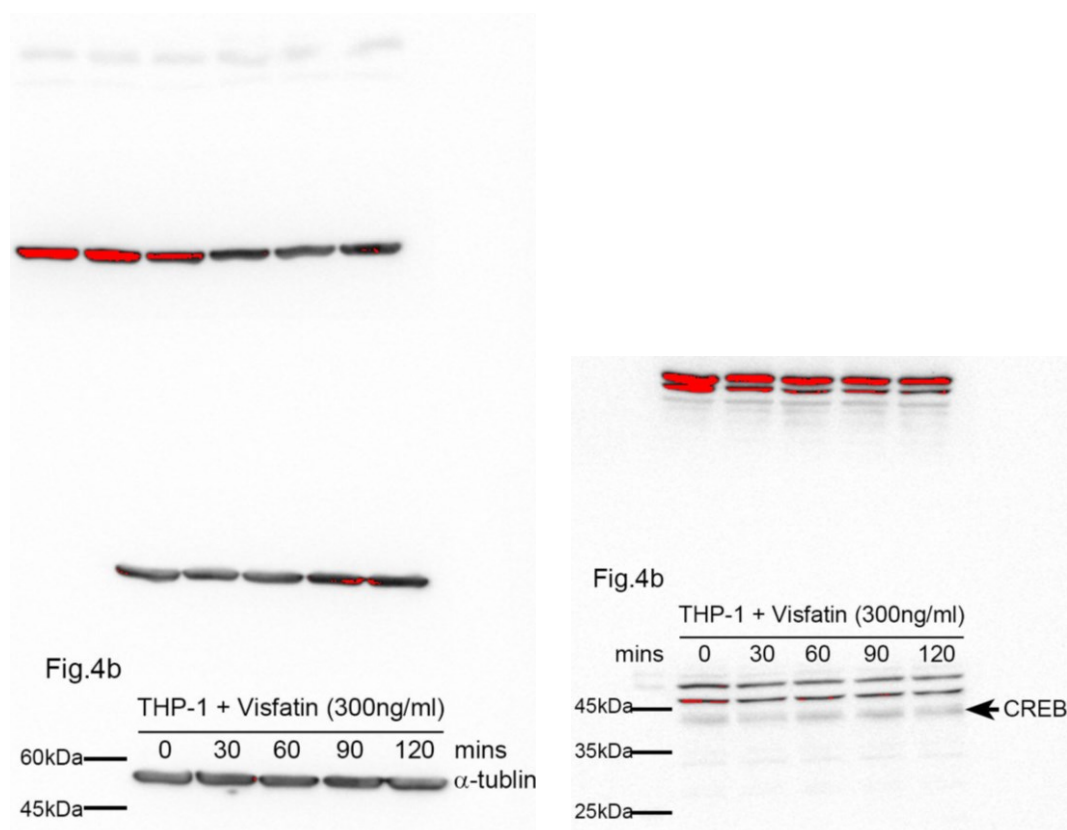

**Fig.4b**

**Fig.4b**

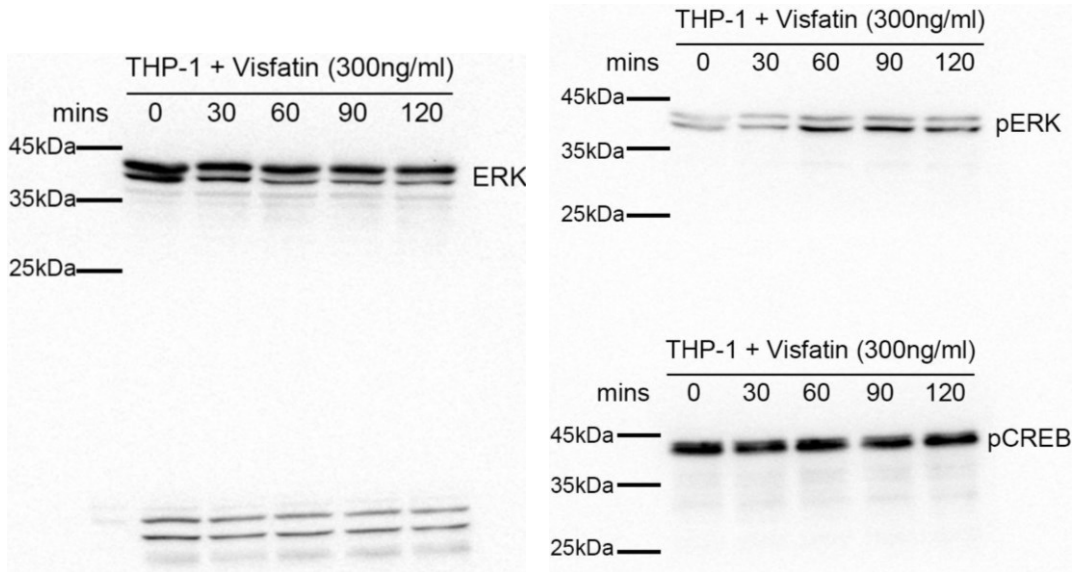

**Figure S9.** Original WB for CREB, pCREB, ERK and pERK expression in THP-1 cells at different time points (0, 30, 60, 90, 120 min) after visfatin (300 ng/ml) treatment.

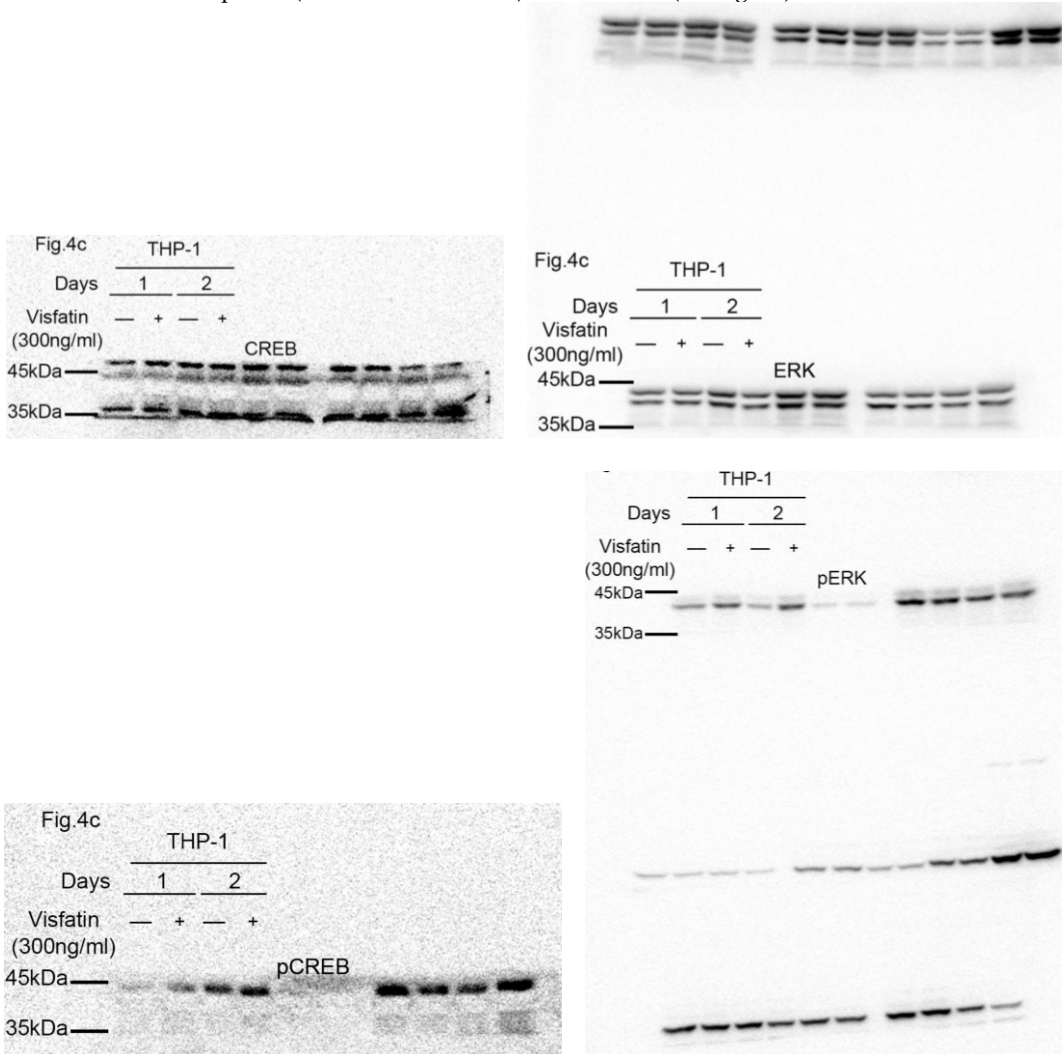

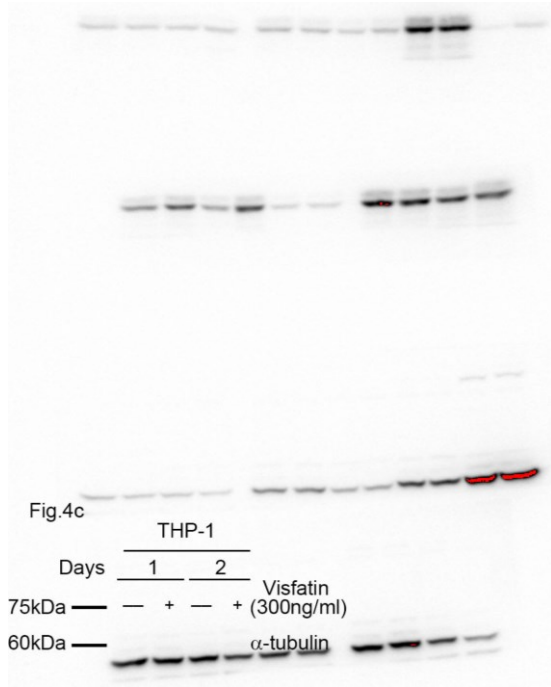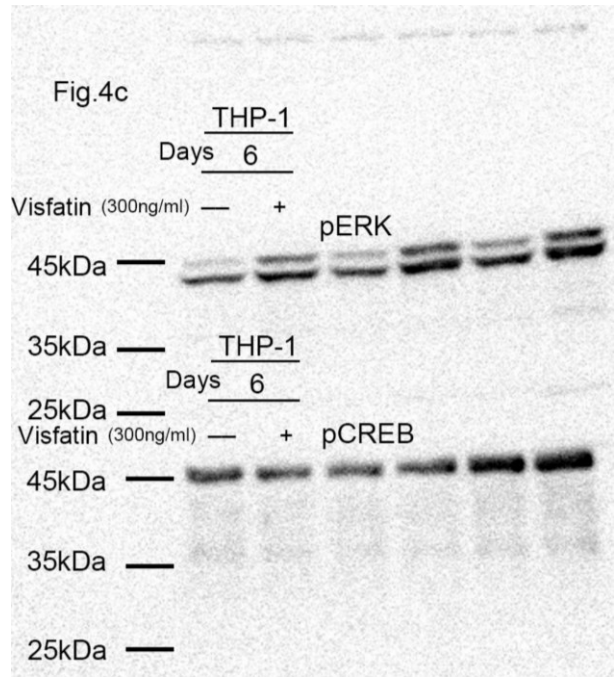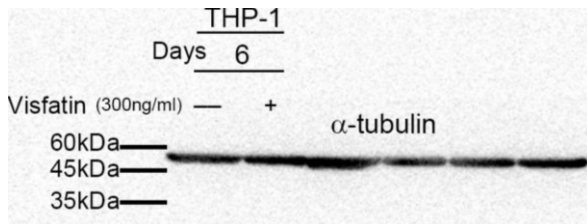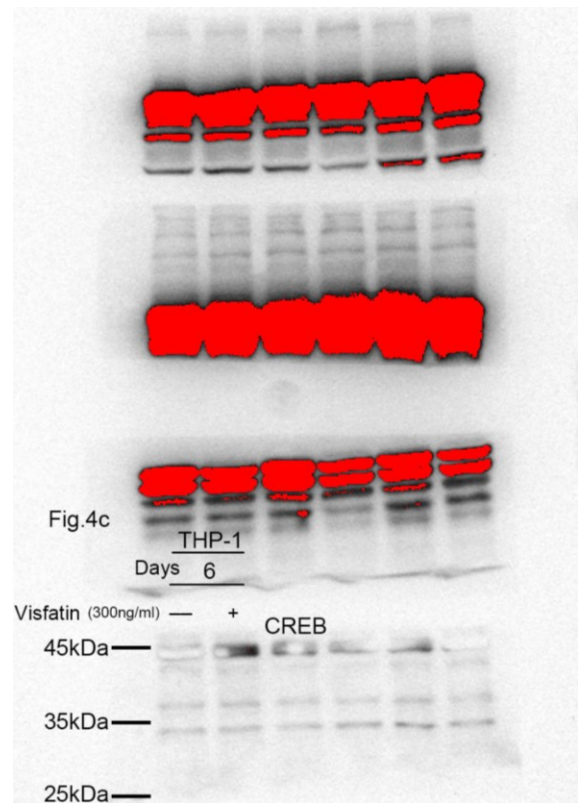

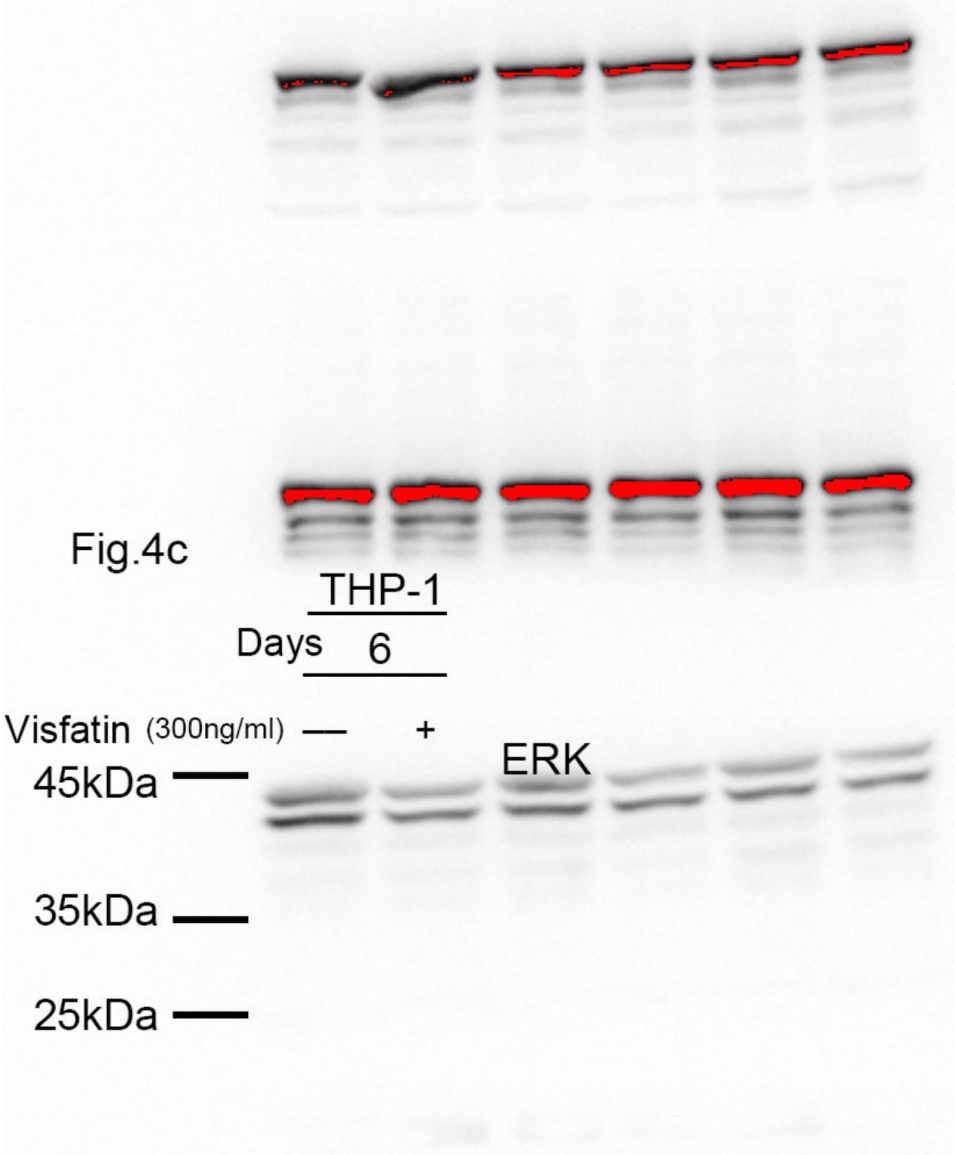

Figure S10. Original WB for CREB, pCREB, ERK and pERK expression in THP-1 cells at 6 days after visfatin (300 ng/ml) treatment.



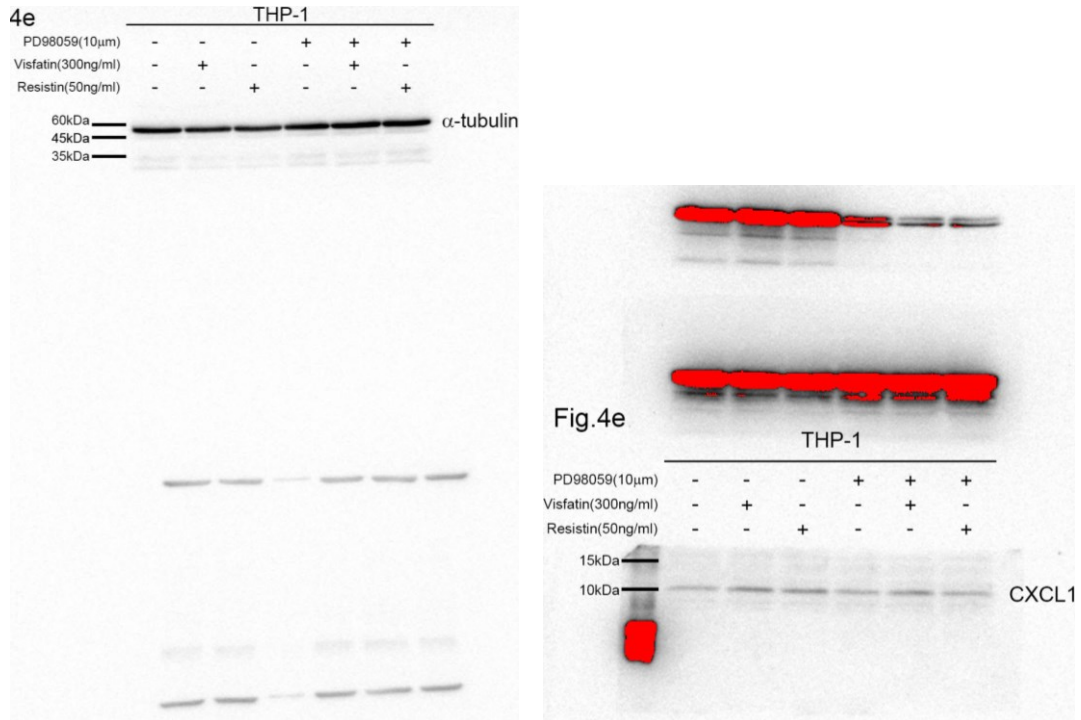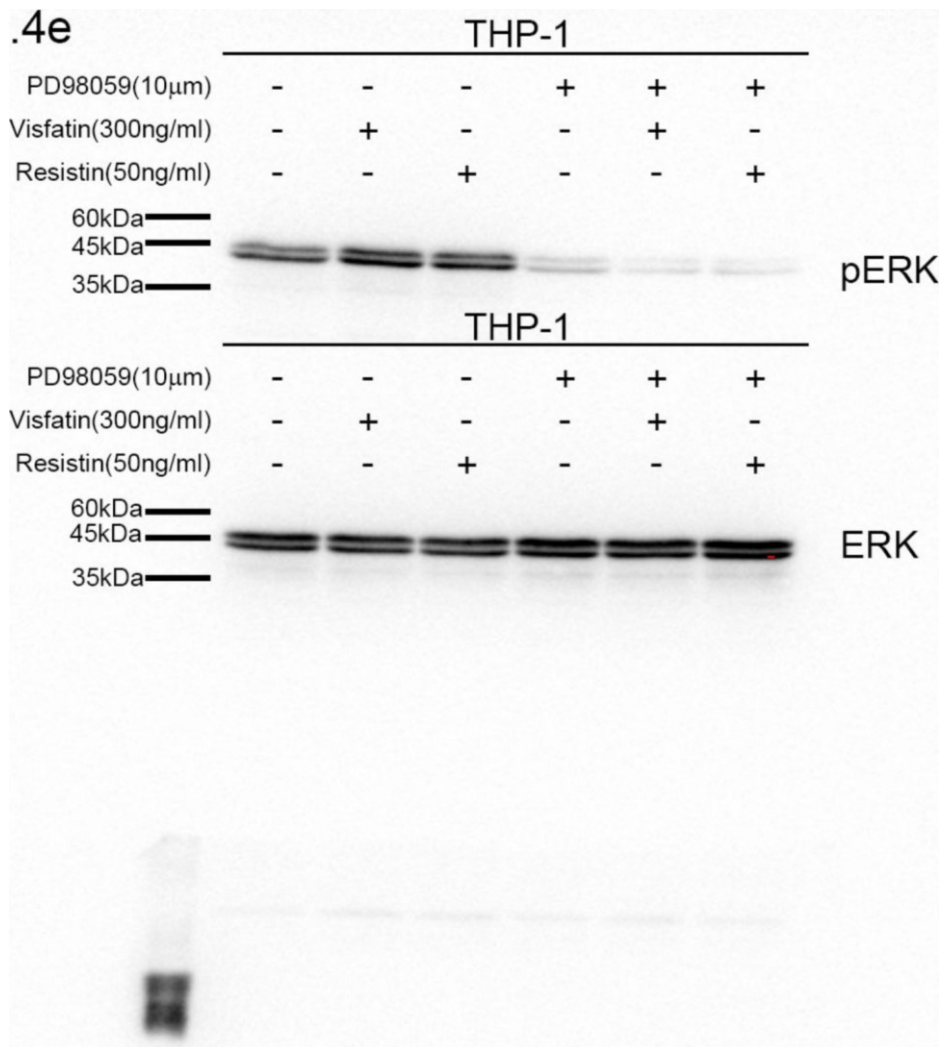

**Figure S11.** Original WB for CXCL1 and pERK in THP-1 cells pretreated with visfatin (300 ng/mL) for six days, and PD98059 (10  $\mu$ M) was added on day 3.

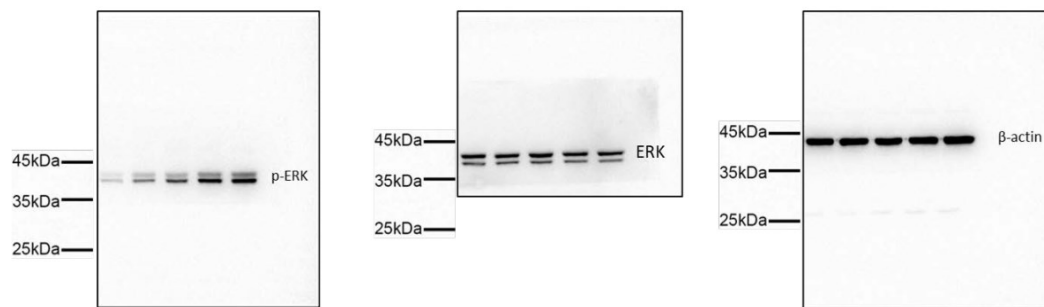

Original WB for figure S4
